1 **Title**

2 **Unbalanced dietary patterns contribute to the pathogenesis of precocious puberty**  
3 **by affecting gut microbiota and host metabolites**

4

5 **Authors:**

6 Ying Wang<sup>1,2#</sup>, Dingfeng Wu<sup>3,4#</sup>, Hongying Li<sup>1,2</sup>, Xiangrong Liang<sup>1,2</sup>, Na Jiao<sup>5,6</sup>, Wenxing  
7 Gao<sup>3</sup>, Lu Zhao<sup>2</sup>, Han Yu<sup>2</sup>, Qian Wang<sup>2</sup>, Yongsheng Ge<sup>2</sup>, Changying Zhao<sup>2</sup>, Meiling Huo<sup>2</sup>,  
8 Ruifang Cao<sup>7</sup>, Sheng Gao<sup>3</sup>, Liwen Tao<sup>3</sup>, Yunchao Ling<sup>7</sup>, Lingna Zhao<sup>7</sup>, Xin Lv<sup>1,2</sup>, Yi Liu<sup>1,</sup>  
9 <sup>2</sup>, Lehai Zhang<sup>1,2</sup>, Haokui Zhou<sup>8</sup>, Guoqing Zhang<sup>7</sup>, Guoping Zhao<sup>7,9,10</sup>, Lei Zhang<sup>1,10,11\*</sup>,  
10 Ruixin Zhu<sup>3,4,6\*</sup>, Zhongtao Gai<sup>1,2\*</sup>

11 <sup>1</sup>Qilu Children's Hospital, Cheeloo College of Medicine, Shandong University, Jinan 250012,  
12 P.R.China.

13 <sup>2</sup>Jinan Children's Hospital, Jinan 250022, P.R.China.

14 <sup>3</sup>Department of Gastroenterology, The Shanghai Tenth People's Hospital, Department of  
15 Bioinformatics, School of Life Sciences and Technology, Tongji University, Shanghai 200092,  
16 P.R.China.

17 <sup>4</sup>Bioinformatics Division, GloriousMed Clinical Laboratory Co., Ltd., Shanghai 201318, P. R.China.

18 <sup>5</sup>Guangdong Institute of Gastroenterology, Guangdong Provincial Key Laboratory of Colorectal and  
19 Pelvic Floor Diseases, Department of Colorectal Surgery, the Sixth Affiliated Hospital, Sun Yat-sen  
20 University, Guangzhou 510655, P.R. China.

21 <sup>6</sup>Research Institute, GloriousMed Clinical Laboratory Co., Ltd., Shanghai 201318, P. R.China.

22 <sup>7</sup>CAS Key Laboratory of Computational Biology, Bio-Med Big Data Center, Shanghai Institute of  
23 Nutrition and Health, University of Chinese Academy of Sciences, Chinese Academy of Sciences,  
24 Shanghai 200031, P.R.China.

25 <sup>8</sup>Shenzhen Institutes of Advanced Technology, Chinese Academy of Sciences, Shenzhen 518055,  
26 P.R.China.

27 <sup>9</sup>Hangzhou Institute for Advanced Study, UCAS, Hangzhou 330106, P.R.China.

28 <sup>10</sup>Microbiome-X, National Institute of Health Data Science of China & Institute for Medical  
29 Dataology, Cheeloo College of Medicine, Shandong University, Jinan 250012, P.R.China.

30 <sup>11</sup>. Department of Biostatistics, School of Public Health, Cheeloo College of Medicine, Shandong  
31 University, Jinan 250012, P.R.China.

32 # Equal contributors

33 \*Correspondence: [zhanglei7@sdu.edu.cn](mailto:zhanglei7@sdu.edu.cn) (L.Z.), [rxzhu@tongji.edu.cn](mailto:rxzhu@tongji.edu.cn) (RX.Z.), [gzt@etyy.com](mailto:gzt@etyy.com)  
34 (ZT.G.)

35

36

37

38

39 **ABSTRACT:**

40 Precocious puberty (PP) mostly stems from endocrine disorders. However, its  
41 triggering factors, especially for the early onset of partial PP, and the associated  
42 pathogenic mechanisms remain ambiguous. In this study, a systematic analysis in the  
43 form of a questionnaire of lifestyles, gut microbiome, and serum metabolome data was  
44 carried out to examine the pathogenesis of PP in a cohort comprised of 200 girls, with  
45 or without PP. The analysis revealed substantial alterations in gut microbiota, serum  
46 metabolites, as well as lifestyle patterns in the PP group, which were characterized by  
47 an elevated abundance of  $\beta$ -glucuronidase-producing and butyrate-producing bacteria,  
48 and excessive lipid concentration with decreased levels of organic nitrogen compounds  
49 in the serum of the participants. These differential microbes and metabolites tend to be  
50 reliable non-invasive diagnostic biomarkers aiding the early diagnosis of PP and exhibit  
51 a strong discriminative power (AUC = 0.93 and AUC = 0.97, respectively).  
52 Furthermore, the microbial biomarkers were confirmed in an independent validation  
53 cohort (n = 83, AUC = 0.85). Moreover, structural equation modeling revealed that  
54 unhealthy dietary habits were the primary contributors for the alteration of gut  
55 microbiota and serum metabolites, triggering the imbalance in the host hormones that  
56 leads to premature physical development. Our study determines a causal relationship  
57 among the gut microbiota, host metabolites, diet, and clinical characteristics of  
58 preadolescent girls who experienced early onset of PP, and formulates non-invasive  
59 diagnostic tools demonstrating excellent performance for the early detection of PP.

60 **Keywords:** causality, dietary pattern, gut microbiota, metabolomics, precocious  
61 puberty.

62

63 **INTRODUCTION**

64 Precocious puberty (PP) refers to the premature occurrence of pubertal development or  
65 secondary sexual characteristics, before the age of 8 in girls and 9 in boys, depicted by

66 features such as advanced breast and ovary development along with rapid bone growth  
67 or maturation (Root, 2000), where the morbidity rate is also seen to rise progressively  
68 (Kim et al., 2015). PP is a hormonal condition predominantly seen in females and can  
69 be attributed to endocrine disorders, accompanied by an elevated sex hormone secretion  
70 (Du et al., 2019). However, there still exists lack of clarity about the triggering factors  
71 of this condition, especially for the premature onset of partial PP, and the pathogenic  
72 mechanisms associated with it. It has been reported that dietary patterns seem to  
73 considerably influence the estrogen metabolism mechanism, which is inextricably  
74 linked with PP (Chen et al., 2018; Kim et al., 2011b; Merzenich et al., 1993; Rogers et  
75 al., 2010). Over-nutrition or hyperalimentation, the excessive consumption of processed  
76 and high-fat diet, is considered to be the principal agent responsible for the secular  
77 decline in pubertal age (Muir, 2006; Soliman et al., 2014). Certain animal studies have  
78 suggested that postnatal over-nutrition tends to invariably escalate the secretion of  
79 luteinizing hormone (LH), follicle stimulating hormone (FSH), leptin, and insulin  
80 levels in pubertal females, while the consumption of postnatal high-fat diet after  
81 commencing weaning stimulates premature puberty in females (Soliman et al., 2014).  
82 At the same time, harmful dietary patterns seem to significantly affect the composition  
83 of human gut microbiota and metabolome (Kong et al., 2014; Sheflin et al., 2017). A  
84 number of former studies conducted on adults with estrogen-mediated diseases, such as  
85 experiencing menopausal symptoms, revealed that gut microbiota is capable of  
86 effectively regulating metabolism and transforming estrogen-like compounds to  
87 biologically active forms (Baker et al., 2017; Frankenfeld et al., 2014). Hence, PP has  
88 been understood to be the outcome of early activation of hypothalamic-pituitary-  
89 gonadal (HPG) axis initiated by certain pathophysiological stimuli, such as gut  
90 microbiota or diet patterns (Brito et al., 1999; Cussotto et al., 2018; Qi et al., 2012).  
91 Therefore, we investigated the gut microbiome and serum metabolome with respect to  
92 the lifestyle information and clinical characteristics for a cohort of 200 participants,  
93 where 133 girls experienced partial PP in early onset stage while 67 were healthy girls.  
94 Our study registered an imperative association between the key metabolomics and  
95 bacterial biomarkers, and their promising discriminatory power values by analyzing the

96 discovery and validation cohorts. Our innovative structural equation modeling (SEM)  
97 analysis demonstrated the direct and/or indirect causal relationships across various  
98 factors of this study for determining PP in preadolescent girls, such as gut microbiota,  
99 host metabolism, lifestyles, and clinical characteristics.

100

## 101 **RESULTS**

### 102 **Baseline Characteristics of Participants**

103 200 female participants were recruited for this study (Table 1). 168 stool samples from participants  
104 were collected for 16S rRNA sequencing to probe the microbiota alterations existing among girls  
105 with PP (n = 105) and normal girls (n = 63). The average age of girls in the PP and the normal groups  
106 at the time of stool sample collection was 6.641 (95 confidence interval, ci95 = 0.403) and 7.008  
107 (ci95 = 0.515) years ( $P = 0.278$ , Table 1), respectively. 129 serum samples were collected for  
108 untargeted metabolomics analysis, which included 45 PP and 84 normal girls illustrating an average  
109 age of 6.662 (ci95 = 0.458) and 6.250 (ci95 = 0.571) years ( $P = 0.289$ , Table 1), respectively.  
110 Additionally, lifestyle information of the 200 participants was obtained by means of a questionnaire  
111 involving 117 variables of dietary patterns, living environment, maternal health, childbirth, and the  
112 physical condition of participants as well as their parents. For the dietary patterns of the participants,  
113 15 variables, including seafood (FDR = 2.36e-5), freshwater products (FDR = 2.91e-5), tubers (FDR  
114 = 0.65e-3), and vegetables (FDR = 0.0021), showed significant differences between PP and the  
115 normal group (Table S1). Likewise, 3 variables depicting the physical condition of the participants,  
116 like dental care (FDR = 0.021), eczema (FDR = 0.045), and normal vaccination (FDR = 0.047), also  
117 showed significant differences among the two groups under consideration (Table S1).

118

### 119 **Gut Microbiota Dysbiosis in Girls Suffering from PP**

120 Gut microbial composition displayed a huge variation between PP and the normal group. As  
121 compared to the normal girls ( $P < 0.001$ , Fig. 1A), significantly elevated bacterial richness was  
122 observed in the PP group. At the same time, the microbial diversity in the PP group appeared to be  
123 substantially distinct from that of the normal group, which was further validated by PERMANOVA  
124 test (pseudo-F = 3.24,  $P = 0.001$ , Fig. 1B). 45 notably differential amplicon sequence variants (ASVs)

125 were identified from the gut microbiota samples of the PP group and the normal controls (FDR <  
126 0.05, Table S2). The abundance of ASVs, assigned as Bacteroidaceae, Ruminococcaceae,  
127 Faecalibacterium, Enterobacteriaceae, and Escherichia-Shigella, was witnessed to have increased,  
128 while those of genus *Agathobacter* and family Peptostreptococcaceae (*Romboutsia* and  
129 *Intestinibacter (I)*) seemed to have decreased in the PP group (Fig. 1D, Table S2). Most of these  
130 differential taxa exhibited the potential of encoding/producing  $\beta$ -glucuronidase (Fig. 1D, Table S2),  
131 an enzyme that deconjugates estrogens into their active forms (Mcintosh et al.).  
132 Furthermore, alterations on microbiome-mediated functional potentials were also explored, which  
133 led to the identification of 88 differential pathways (FDR < 0.05) between PP and the normal group  
134 (Fig. S1A). The PP group demonstrated enhanced activity levels in most metabolic processes, such  
135 as metabolizing carbohydrate, cofactor and vitamin, fatty acid and lipid, and inorganic nutrient  
136 metabolism.

137

### 138 **Microbial Markers Could Act as Non-Invasive Tools for PP Diagnosis**

139 To explore the possibility of differential microbes functioning as prospects of novel non-invasive  
140 tools for PP diagnosis, a classification model was designed by employing 45 differential ASVs via  
141 random forest algorithm. The model emerged highly capable for performing the clinical diagnosis  
142 of PP, with an area under the receiver operating characteristic curve (AUC) of about 0.93 (Fig. 1C).  
143 Afterwards, the classification model was validated in an independent cohort (n = 83, Table S3) to  
144 further measure its generalization ability. The model constituting of 13 out of 45 differential ASVs  
145 that exhibited the same abundance change pattern accomplished excellent results for distinguishing  
146 between PP and the normal group with an AUC of about 0.85 (Fig. S2B). These 13 ASVs primarily  
147 belonged to *Bacteroides* and Enterobacteriaceae (Table S3) and illustrated critical elevation  
148 regarding several metabolic processes in the PP group (Fig. S1B).

149

### 150 **Latent Microbial Factors Revealed Underlying Relationships of Altered Microbiome**

151 Delving into the underlying relationships among differential taxa, we performed exploratory factor  
152 analysis (EFA) and identified 10 latent microbial factors, which revealed the latent patterns of the  
153 change in gut microbiota. These factors were then presented in the microbial co-occurrence network  
154 (Fig. 1D). The classification models designed on the basis of these 10 microbial factors achieved a

155 high accuracy (AUC = 0.88, Fig. S2A) in distinguishing the PP group from the normal controls, not  
156 only indicating the efficacy of the EFA analysis but also preserving the vital information possessed  
157 by differential taxa. Methodically speaking, Gammaproteobacteria, such as family  
158 Enterobacteriaceae and genus *Escherichia-Shigella*, which retained a strong correlation with each  
159 other, were members of Factor 1 and 6 (Fig. 1D). The chief members of Factor 2, genus  
160 *Subdoligranulum* and *Faecalibacterium* of family Ruminococcaceae, are known as butyrate-  
161 producing bacteria in gut microbiota (Cussotto et al., 2018). Besides, four taxa, *Romboutsia*,  
162 *Intestinibacter*, *Streptococcus*, and *Haemophilus*, present in a considerably low concentration in the  
163 PP group, expressed a strong loading in Factor 7 (Fig. 1D, Table S2). Notably, several species  
164 (except Peptostreptococcaceae, Factor 7), were witnessed in elevated measures in the PP group (Fig.  
165 1D, Table S2). Among them, factor *Bacteroides*, butyrate-producing bacteria, Enterobacteriaceae,  
166 and Burkholderiaceae appeared to be the most relevant towards the microbial metabolic pathways  
167 (Fig. S1B) and could prove to be instrumental in microbial biological functions.

168

#### 169 **Altered Serum Metabolome in Girls Suffering from PP**

170 Untargeted metabolomic profiles were evaluated under LC-MS/MS system in 84 PP and 45 normal  
171 girls (Table 1) for the purpose of investigating metabolite alterations, and 182 differential  
172 metabolites were identified (FDR < 0.05, Table S4). Among them, 131 differential metabolites, such  
173 as Phenylalanine, 4-Guanidinobutamide, and Lysophosphatidylcholine (LPC), were present in  
174 decreased quantities in the PP group as compared to the normal controls (Table S4). Significantly,  
175 these 182 differential metabolites were remarkably efficient in differentiating the PP group from the  
176 normal controls and obtained an AUC of 0.97 (Fig. 2B), which appears to be higher than microbial  
177 markers.

178

#### 179 **Organic Nitrogen Compounds and Lipids Were the Characteristic Latent Metabolic Factors**

180 Analogous to the EFA analysis for microbiota, 12 latent metabolic factors were identified based on  
181 their differential metabolites (Fig. 2A, Table S4). Preserving the foremost information, the metabolic  
182 factors exhibited the detection capability comparable to that of the differential metabolites for  
183 detecting PP (AUC = 0.97, Fig. S2C). Specifically, Factor 1 constituted of organic nitrogen  
184 compounds (Fig. 2A), including oligopeptide and nitrogen-containing alkaloids (such as

185 Ethylmorphine, Levallorphan, and Alangicine), and their abundances were seen consistently  
186 declining in the PP group (Table S4). The serum levels of lipids in the PP group (Factor 2), such as  
187 Oleoylethanolamide (Fold-change, FC = 158.85), 17beta-Nitro-5alpha-androstane (FC = 59.90),  
188 Thiofanox (FC = 54.32), and 17-Methylstearate (FC = 17.33) were observed to be considerably  
189 elevated (Fig. 2A, Table S4). In addition, an appreciable reduction in several other differential  
190 metabolites, such as organosulfur compound (Factor 3), phenylalanine (Factor 5), and terpenoid  
191 (Factor 6) were detected in the PP group as compared to the normal group (Table S4).

192

### 193 **Associations Between Microbial Factors and Metabolic Factors**

194 Subsequently, the associations between microbial and metabolic factors were evaluated to discover  
195 the potential key drivers of such modifications. Relatively, organic polycyclic compound  
196 expressed vital positive correlations with *Lachnospira*, Enterobacteriaceae, *Dialister*,  
197 Peptostreptococcaceae, and Burkholderiaceae (Fig. 2C). Among them, Enterobacteriaceae was  
198 positively associated with aferine, phenylalanine, and with LPC as well. The overlapping metabolic  
199 pathways, such as amino acid, carbohydrate, aromatic compound metabolic pathway, and others  
200 (Glycolysis II, Glyoxylate cycle, and Incomplete reductive TCA cycle), could prove to be the  
201 foundation of the strong relationships between microbiota and metabolites (Fig. S1B). Interestingly,  
202 even though *Bacteroides* and butyrate-producing bacteria exhibited striking correlations to most  
203 metabolic pathways (Fig. S1B), they were not significantly associated with the differential  
204 metabolites of PP (Fig. 2C). Furthermore, organic nitrogen compounds and lipids revealed no  
205 substantial connection with most of the gut microbiota factors, except for factor *Alistipes* and factor  
206 *Dialister* (Fig. 2C), suggesting that they may be directly affected by other factors, such as lifestyles.

207

### 208 **Three PP Subtypes Were Revealed by Differential Metabolites**

209 In comparison to the gut microbiota, more evident modifications were seen in serum metabolism  
210 (Fig. S3A, B). The girls in the PP group were classified into three subgroups based on the expression  
211 of 182 differential metabolites, all of which demonstrated varied metabolite patterns, implying that  
212 PP could be categorized into 3 different subtypes. Specifically, latent metabolic factors, organic  
213 nitrogen compounds, and organic polycyclic compounds emerged critically different among the  
214 three defined subtypes (Fig. S3C and Table S5). Moreover, some latent microbial factors, such as

215 Peptostreptococcaceae and Lachnospira, also expressed varying abundance patterns among these  
216 subtypes. Additionally, clinical laboratory tests, such as for LH, testosterone (TES), Zn, and Ca,  
217 presented a similar trend (Fig. S3C). Although the widely utilized standard suggests no difference  
218 between the various phenotypes (Table S5), subtype 2 showed a tendency to be distinct from the  
219 other two subtypes and appeared to be more analogous to the normal group, which highlights the  
220 individual differences among the PP group, especially in the metabolic changes.

221

### 222 **Dietary Pattern Varied Significantly between Groups**

223 Detailed lifestyle information that may potentially affect the PP group was obtained, including  
224 dietary patterns, living environment, maternal health, childbirth, and physical condition of the  
225 participants and their parents (Table S1). Dietary patterns presented considerable differences among  
226 the patients and displayed good discriminative ability for distinguishing the PP group from the  
227 normal controls, obtaining an AUC of about 0.87 (Fig. S2D). However, other lifestyle variables  
228 failed to express any significant variations between the normal and the PP groups (Table S1) along  
229 with a poor discriminative ability (Fig. S2E-H).

230 Furthermore, EFA facilitated the identification of 9 latent dietary factors derived from the dietary  
231 patterns recorded (Fig. 3A, Table S6), which preserved the foremost information of dietary patterns  
232 (AUC = 0.86, Fig. 3C). As expected, these latent dietary factors were an amalgamation of the various  
233 aspects of the children's diet, such as healthy foods, junk foods, items containing monosodium  
234 glutamate (MSG), and the balance between meat and vegetables. The most critical latent dietary  
235 factor, healthy foods, appeared to have a significantly lower intake rate in the PP group (FDR =  
236 0.30e-4, Fig. 3B), which entails preferences for seafood, freshwater products, tubers, vegetables,  
237 bean products, fruits, nuts, etc. (Table S6). Several noteworthy correlations were noticed between  
238 dietary, microbial, and metabolic factors (Fig. 3D). The intake of healthy foods expressed a highly  
239 negative correlation with the abundance of serum lipid ( $P < 0.01$ ). On the other hand, the intake of  
240 snacks and drinks were witnessed to be positively linked with the organic nitrogen compounds ( $P$   
241  $< 0.01$ ), whereas negatively correlated with butyrate-producing bacteria ( $P < 0.05$ ). These results  
242 were indicative of the unbalanced dietary patterns influencing the PP progression through  
243 microbiota and metabolites.

244



## 245 **Unbalanced Dietary Patterns Affecting PP Progression Through Microbiota and Metabolites**

246 Supported by the above results, potential causal relationships among gut microbiota, metabolites,  
247 dietary patterns, and the characteristics of the disease were investigated. For this purpose, we  
248 introduced the innovative SEM path analysis to construct a credible model (Fisher's  $C = 815.85$  with  
249  $P = 0.341$ ) in accordance with the correlation results (Fig. 2, 3 and Fig S2I) and our prior knowledge  
250 about the subject, to reveal the internal connections among them (Fig. 4). Hormones (estradiol (E2),  
251 prolactin (PRL), LH and FSH, and trace elements (Zn, Ca, My, Cu, Fe) were significantly regulated  
252 by gut microbiota and serum metabolism. Among the serum metabolism agents, lipids elevated in  
253 the most dramatic fashion in the PP group (Table S4), positively affecting the ovarian volume ( $P <$   
254  $0.05$ ), while producing a negative effect on the breast volume ( $P < 0.05$ ). The reduced intake of  
255 healthy foods ( $P < 0.001$ ) and elevated intake of all-meat diet ( $P < 0.001$ ) were known to be the  
256 primary factors causing the surge of serum lipids. Similarly, organic nitrogen compounds, the  
257 principal metabolic factor, produced a significantly positive effect on the level of serum E2 and  
258 further affected the development of ovarian volume. As an important sex hormone, LH was  
259 appreciably decreased in the PP group ( $P < 0.01$ , Table S7) and generated a considerably positive  
260 effect on the bone age ( $P < 0.05$ ) and uterine volume ( $P < 0.001$ ) in the PP group (Fig. 4). In serum  
261 metabolism, LPC may be the chief influencing factor of LH ( $P < 0.05$ , Fig. S2I). Furthermore,  
262 butyrate-producing bacteria, including genus *Subdoligranulum* and *Faecalibacterium* of family  
263 Ruminococcaceae, produced stronger positive effects on the follicle size ( $P < 0.05$ ). The up-  
264 regulation of butyrate-producing bacteria may possibly be able to explain the premature  
265 development of follicles in the PP group.

266 The SEM analysis revealed that dietary patterns were the most vital of all the catalysts of change in  
267 microbiota and metabolism. Simultaneously, the dysbiosis of the gut bacteria taxa and metabolites  
268 produced a remarkable effect on the host hormone levels and PP progression (Fig. 4).

269

270

## 271 **DISCUSSION**

272 Mounting evidence suggests that gut microbiota and metabolism are the major decisive forces of  
273 the growth in children (Tamburini et al., 2016a; Yatsunencko et al., 2012). Nevertheless, no definite  
274 explanation is available about the effects of gut microbiota and serum metabolism in the

275 pathogenesis of precocious puberty. In this study, we performed a systematic analysis investigating  
276 the lifestyle patterns, altered microbiota, metabolome, and their relationship with PP.

277 It was found that the PP group showed a significant dysbiosis of gut microbiota and serum  
278 metabolome, which could be mainly attributed to the unhealthy dietary habits, directly affecting the  
279 progression of PP. At the same time, gut microbiota and serum metabolome could prove to be non-  
280 invasive as well as reliable diagnostic biomarkers for the early detection of PP, expressing an AUC  
281 = 0.93 and 0.97, respectively, and can help evade the time-consuming and painful gonadotropin-  
282 releasing hormone (GnRH) stimulation test (Kim et al., 2011a).

283 Diet shapes our gut microbiota in the early stages of our life (Tamburini et al., 2016b; Zmora et  
284 al., 2019). A large number of studies have suggested that unhealthy dietary habits shift the gut  
285 microbiota and may very well contribute to the pathogenesis of various metabolic diseases,  
286 including overweight, obesity, type 2 diabetes, non-alcoholic liver disease, cardio-metabolic  
287 diseases, and malnutrition (Fan and Pedersen, 2020; Tamburini et al., 2016b). An extensively shifted  
288 microbial composition was detected in the PP group, implying a dysbiosis of gut bacterial  
289 community.  $\beta$ -glucuronidase-producing bacteria, including *Alistipes*, *Bacteroides*, *Escherichia*, and  
290 *Faecalibacterium* were noticed to be significantly increased in the PP group, possibly triggering the  
291 elevated levels of circulating estrogen and increased estrogenic burden, which actuate the onset of  
292 PP (Baker et al., 2017; McIntosh et al.; Sultan et al., 2012). The shift in gut microbiota, especially  
293 *Bacteroides* and butyrate-producing bacteria is capable of affecting various metabolic processes  
294 (Fan and Pedersen, 2020), such as carbohydrate, fatty acid, and lipid metabolism activity (Fig. S1).  
295 Interestingly, butyrate-producing bacteria, which was considered to be a beneficial bacteria for  
296 maintaining the gut health in several preceding studies (Cheng et al., 2016; Valles-Colomer et al.,  
297 2019), may emerge as a pathogenic agent for PP. Considering the promoting effect of butyrate to  
298 the levels of LH (Ruddon et al., 1979) and FSH (Ghosh and Cox; Liang et al., 2020), we propose  
299 that overproducing butyrate induced by gut bacteria may produce a detrimental effect on the health  
300 condition during puberty, especially for follicular development (Fig. 4). Consistent with the previous  
301 study on the gut microbiota of girls suffering from PP conducted by Dong et al., the gut bacteria  
302 related to the production of short-chain fatty acids (SCFAs) are known to be present in increased  
303 concentrations in girls suffering from PP, which promote the expression of the leptin gene, activate  
304 the HPG axis through a high concentration of SCFAs, and trigger the early onset of puberty (Dong

305 et al., 2019).

306 Moreover, PP gives rise to a more serious metabolic disturbance. Differential metabolites exhibit  
307 a strong ability for PP diagnosis (AUC = 0.97) and present three different PP subtypes. A large  
308 amount of organic nitrogen compound down-regulation and lipid up-regulation with high fold-  
309 change were seen to be the chief characteristics of PP serum metabolome. Decreased intake of  
310 healthy foods ( $P < 0.001$ ), the unique differential dietary pattern of PP, illustrated a direct effect on  
311 the serum levels of lipids (2-158 fold increase), which was previously verified in high-fat diet mice  
312 (Walker et al., 2017). Overnutrition and excessive intake of processed and high-fat food leads to  
313 obesity at the beginning of the PP pathogenesis (Latronico et al., 2016; Mugo et al., 2007). In  
314 addition, animal studies have also indicated that postnatal overnutrition consistently increases the  
315 LH, FSH, leptin, and insulin levels in pubertal females, and postnatal high fat diet after commencing  
316 weaning tends to trigger advanced puberty in females [31,32]. The dysbiosis of the serum  
317 metabolites indicates an influence on the level of serum metallic elements (Ca, Zn, Cu, Mg, and Pb),  
318 which could be potential endocrine disrupters that are capable of modulating estrogenic activity of  
319 endogenous hormones (Arjmandi et al., 1993).

320 Unlike the traditional correlation research, this study adopted the causal inference method based  
321 on the SEM analysis, which has been progressively implemented for varied purposes in the  
322 microbiome field (Chen et al., 2019; Mamet et al., 2019). This method can effectively derive and  
323 comprehend the causal relationships between dietary patterns, gut microbiota, serum metabolome,  
324 and PP. Being constrained by prior knowledge and data integrity, the explanation for some results  
325 remains unclear, and requires further in-depth research.

326 In summary, it was found that unhealthy dietary habits could disrupt the homeostasis of gut  
327 microbiota and serum metabolism, and consequently trigger the imbalance of hormones, leading to  
328 the excessive change of physical development progress and PP genesis. Therefore, the intestinal  
329 microbiota may be regarded as a prospective therapeutic target for the prevention and treatment of  
330 PP.

### 331 **Limitations of Study**

332 The etiology of PP remains complicated; hence it requires further validation by employing larger  
333 samples and effectively designing disease prediction models. In addition, although this study  
334 included the validation cohorts, the multi-center studies and big sizes of the validation cohorts will

335 be needed to further validate the biomarkers found in this study.

336

## 337 **Materials and methods**

### 338 **Study participants**

339 133 girl participants with partial PP and 67 normal girls were recruited in the discovery cohort at  
340 Qilu Children's Hospital, Shandong University (Table 1) for this study. 66 normal and 17 girls  
341 suffering from PP (age < 8) were included in the independent validation cohort to externally verify  
342 our findings. The PP group was diagnosed in accordance with the criteria defined by Lawson  
343 Wilkins Pediatric Endocrine Society. Exclusion criteria includes (1) other organic etiologies with  
344 presence of isointense tumor on magnetic resonance imaging (MRI); (2) usage of antibiotics,  
345 probiotics, or prebiotics within 3 months before enrolling; (3) associated endocrine, gastrointestinal,  
346 metabolic disease (including obesity and diabetes, among others), mental disease, or hepatobiliary  
347 disease. Recruited age-matched normal controls were girls below 8 years of age without PP. The  
348 study protocol was maintained in accordance with the Declaration of Helsinki and was approved by  
349 the Ethics Committee of Qilu Children's Hospital (ETYY-2016-202). Written informed consents  
350 and questionnaires were obtained from the children's parents.

351

### 352 **Sample collection**

353 Stool and blood samples were collected from each participant and stored at -80 °C before analysis.  
354 200 mg stool was preserved in sterile 2 ml tubes containing pure ethanol, aliquoted (Tinygene  
355 Biological Company, China) and stored at -80 °C for 16S rRNA sequencing. Blood samples were  
356 thawed at 4 °C, 3000 rpm, and centrifuged at 4 °C for 10 min. Serum aliquots were immediately  
357 frozen at -80 °C for further untargeted metabolomics analysis. The study was approved by local  
358 ethics committees (Qilu Children's Hospital of Shandong University, IRB Number EYY-2016-202)  
359 and informed consent was obtained from all the participating subjects.

360

### 361 **DNA extraction and illumina sequencing**

362 Total DNA extraction from fecal samples (250 mg, wet weight) was performed using a Fast DNA  
363 SPIN Kit for feces (MP Biomedicals, Santa Ana, CA, USA), as per the manufacturer's instructions.  
364 The V1-V2 hypervariable region was amplified with the universal primer pair F27 (5' -

365 AGAGTTTGATCMTGGCTCAG-3') and R355 (5'- GCTGCCTCCCGTAGGAGT -3').  
366 Sequencing was conducted on Illumina HiSeq 2500 System (Illumina Inc., San Diego, CA, USA)  
367 using the 2 × 250 paired-end mode following the standard Illumina platform protocols. All  
368 sequencing data is available at NODE (<http://www.biosino.org/node>) with the accession number  
369 OEP000731.

370

### 371 **16S rRNA gene sequencing data analysis**

372 16S rRNA sequencing data was analyzed using Quantitative Insights Into Microbial Ecology  
373 (QIIME2 V.2019.07). In brief, raw sequence data was demultiplexed and DADA2 (SP) was  
374 employed to denoise sequencing reads for quality control and the identification of amplicon  
375 sequence variants (ASVs) via q2-dada2 plugin. Taxonomy classification was carried out by utilizing  
376 classify-sklearn based on a Naiva Bayes classifier against the Silva-132-99 reference sequences.  
377 Respective sequences of each ASV were aligned with Multiple Alignment using Fast Fourier  
378 Transform (MAFFT) (Kato et al., 2002) (via q2-alignment) and the phylogenetic tree was  
379 constructed with Fast-Tree (Price et al., 2010) (via q2-phylogeny). Chao1, an index of richness  
380 estimator, was calculated to assess the community alpha diversity. Principal coordinate analysis  
381 (PCoA) was performed based on the Bray-Curtis distance; and PERMANOVA test was conducted to  
382 evaluate the significant differences present among the microbial communities, with 9999  
383 permutations.

384 Additionally, the functions of gut microbiota were inferred based on 16S rRNA sequencing data  
385 using Phylogenetic Investigation of Communities by Reconstruction of Unobserved States  
386 (PICRUST2), as previously described (Douglas et al., 2020).

387

### 388 **Untargeted metabolomics and analysis**

389 100 µL of serum sample was transferred to an EP tube. After the addition of 300 µL of methanol  
390 (containing internal standard 1 µg/mL), the samples were vortexed for 30 s, followed by sonication  
391 for 10 min in ice-water bath, and incubation for 1 h at -20 °C to precipitate the proteins. The sample  
392 was then centrifuged at 12000 rpm for 15 min at 4 °C. The resulting supernatants were then  
393 transferred to LC-MS vials and stored at -80 °C until the UHPLC-QE Orbitrap/MS analysis. The

394 quality control sample was prepared by mixing an equal aliquot of the supernatants from all the  
395 samples collected.

396 LC-MS/MS analyses were performed using an UHPLC system (1290, Agilent Technologies) with  
397 a UPLC HSS T3 column (2.1 mm × 100 mm, 1.8 μm) coupled to Q Exactive (Orbitrap MS, Thermo).

398 The mobile phase A was 0.1% formic acid in water for positive, and 5 mmol/L ammonium acetate  
399 in water for negative, and the mobile phase B was acetonitrile. The elution gradient was set as

400 follows: 0 min, 1% B; 1 min, 1% B; 8 min, 99% B; 10 min, 99% B; 10.1 min, 1% B; 12 min, 1%

401 B. The flow rate was 0.5 mL/min. The injection volume was 2 μL. The QE mass spectrometer was

402 utilized due to its ability to acquire MS/MS spectra on an information-dependent basis (IDA) during

403 an LC/MS experiment. In this mode, the acquisition software (Xcalibur 4.0.27, Thermo)

404 continuously examines the full scan survey MS data as it collects and triggers the acquisition of

405 MS/MS spectra depending on preselected criteria. ESI source conditions were set as follows: Sheath

406 gas flow rate as 45 Arb, Aux gas flow rate as 15Arb, Capillary temperature at 400 °C, Full ms

407 resolution as 70000, MS/MS resolution as 17500, Collision energy as 20/40/60 eV in NCE model,

408 Spray Voltage as 4.0 kV (positive) or -3.6 kV (negative), respectively.

409 Raw data was converted to mzXML format using ProteoWizard and processed using MAPS

410 software (version 1.0). Preprocessed results were employed to generate a data matrix which

411 consisted of the retention time (RT), mass-to-charge ratio (m/z) values, and peak intensity. In-house

412 MS2 database was applied for metabolites identification.

413

#### 414 **Questionnaire survey**

415 Questionnaires were distributed to the participants and their parents in presence of trained doctors,

416 providing professional guidance throughout the whole process. From the questionnaire survey, 117

417 variables were collected, involving dietary pattern, living environment, maternal health, childbirth,

418 and personal physical condition of the recruited girls (PP and normal group), as well as the physical

419 condition of their parents.

420 The dietary pattern section in our questionnaire was based on the most frequently consumed foods

421 that were clinically considered to be closely related to PP, including vegetables, fruits, seafood, meat,

422 cereal, tubers, eggs, milk, bean products, nuts, fungi, greasy food, beverages, fried food, sweets,

423 barbecued food, puffed food, pickles, gourmet powder, and tonic, on a 4-level intake frequency

424 scale. The dietary section also entailed personal food preferences, including preferences for fruit,  
425 vegetables, meat, pasta, bean products, fried food, snacks, beverage, meat, etc.

426 The variables regarding living environment included presence of pets, use of mineral water,  
427 existence of bowel dysfunction of close contacts, presence of plastic foam products, pesticides,  
428 fertilizers, insecticide, etc. The questionnaire also separately covered the physical condition of  
429 participants' parents, including stomachaches, abdomen distension, diarrhea, gastric acid  
430 regurgitation, constipation, hypertension, hyperglycemia, anemia, rheumatism, urticaria,  
431 immunodeficiency, and irregular menstruation and menarche age (only for mothers). The data about  
432 maternal conditions during pregnancy and delivery was derived, including reproductive age,  
433 medication during pregnancy, secretory disorders during pregnancy, folic acid supplement, dietary  
434 patterns, alcohol consumption, abnormal fetal movement, oxytocin, dystocia, or fetal hypoxia,  
435 cesarean delivery, or spontaneous delivery, etc. The physical condition of the recruited girls was  
436 investigated thoroughly, including sleep disorder, poor weight gain, jaundice, eczema, diarrhea, oral  
437 malodor, sediment in urine, smelly urine, perianal red, dental caries, etc.

438

#### 439 **Clinical laboratory tests**

440 Clinical parameters were determined at the clinical lab of Qilu Children's Hospital. The trace  
441 element (Cu, Zn, Ca, Mg, Fe, and Pb) levels from serum samples were measured using the flame  
442 atomic absorption method (BH5100, Bohui, China). The thyroid function test was conducted by  
443 analyzing the serum levels of follicle stimulating hormone (FSH), luteinizing hormone (LH), and  
444 thyroid stimulating hormone (TSH), employing the chemi-luminescence immunoassay methods  
445 (Abbott, Architect I2000, US). GnRH stimulation test was conducted for the luteinizing hormone  
446 (LH) and follicle-stimulating hormone (FSH) utilizing the chemi-luminescence immunoassay  
447 methods (Abbott, Architect I2000, US). Cortisol (COR), adrenocorticotrophic hormone (ACTH),  
448 alpha fetoprotein (AFP), and carcinoembryonic antigens (CEA) were measured by chemi-  
449 luminescence immunoassay methods (LIAISON, type 2210, Germany). The plasma levels of the  
450 insulin and insulin-like growth factors were quantified by adopting immunoluminescence method  
451 (Siemens immulite 2000, USA). The sizes of uterus, breasts, and ovaries, as well as the number of  
452 ovarian follicles were determined by employing B-ultrasonic examination (EPIQ5, L12-5, Philips,  
453 Holland). The hand-wrist radiographs were used for bone-age assessment through nuclear magnetic

454 resonance (MRI) examination (Digital Dianost3, Philips, Holland).

455

#### 456 **Co-occurrence analysis**

457 Co-occurrence analysis was applied for microbial, metabolic, or dietary network by using  
458 correlations (Spearman, Spearman or Kendall). Correlations with  $P \leq 0.05$  (permutation test with  
459 1000 permutations) were included in the co-occurrence networks. Network visualization was  
460 conducted using Gephi software (M et al., 2009).

461

#### 462 **Disease diagnosis model**

463 Classification model of different samples was constructed using Random Forest classifier in Scikit-  
464 learn package of Python (3.6.0)(F et al., 2011). The AUC of 5-fold cross-validation was utilized to  
465 measure the discriminative ability of the differential biomarkers.

466

#### 467 **Exploratory factor analysis**

468 For differential microbiota, metabolites, and dietary patterns, exploratory factor analysis (EFA) was  
469 employed to identify the latent factors with FactorAnalyzer in Python (C, 2016). The number of  
470 factors, solutions (minimum residual, maximum likelihood or principal factor), and rotations  
471 (varimax or promax) of EFA were determined by minimizing information loss after dimension  
472 reduction, which was evaluated by the discriminative ability of the classification of normal and PP  
473 samples. Latent factors with high loading were explained and labeled based on the observed  
474 variables and former knowledge.

475

#### 476 **Structural equation model**

477 Based on the latent factors from EFA, path analysis of the SEM (D et al., 2019) was employed to  
478 discover the causal relationships between lifestyle, gut microbiota, metabolism, and clinical  
479 characteristics of disease. Considering that the samples cannot match perfectly, piecewise SEM  
480 (Shipley, 2013) was used for confirmatory path analysis in our study, in which each set of  
481 relationships was determined independently (or locally). The p-value of Fisher's C statistic was  
482 adopted to prove the overall rationality of the model and to facilitate the model comparison and  
483 selection.



484

## 485 **Statistical analysis**

486 All statistical analyses were conducted using Python (3.6.0). Statistical significance was determined  
487 by two-sided Wilcoxon rank-sum test, Permutation test or one-sided Fisher's exact test, and  
488 Benjamini-Hochberg test was applied to control the false positive rate (FDR) under multiple  
489 comparisons. Differences were considered statistically significant when  $FDR < 0.05$ .

490

## 491 **REFERENCES:**

- 492 Arjmandi, B.H., Salih, M.A., Herbert, D.C., Sims, S.H., and Kalu, D.N. (1993). Evidence for  
493 estrogen receptor-linked calcium transport in the intestine. *Bone and mineral* 21, 63-74.
- 494 Baker, J.M., Al-Nakkash, L., and Herbst-Kralovetz, M.M. (2017). Estrogen–gut microbiome axis:  
495 physiological and clinical implications. *Maturitas* 103, 45-53.
- 496 Brito, V., Batista, M., Borges, M., Latronico, A., Kohek, M., Thirone, A., Jorge, B., Arnhold, I., and  
497 Mendonca, B. (1999). Diagnostic value of fluorometric assays in the evaluation of precocious  
498 puberty. *The Journal of Clinical Endocrinology & Metabolism* 84, 3539-3544.
- 499 C, H.M. (2016). A review of exploratory factor analysis decisions and overview of current practices:  
500 What we are doing and how can we improve? *International Journal of Human-Computer Interaction*  
501 32, 51-62.
- 502 Chen, C., Chen, Y., Zhang, Y., Sun, W., Jiang, Y., Song, Y., Zhu, Q., Mei, H., Wang, X., and Liu, S.  
503 (2018). Association between dietary patterns and precocious puberty in children: a population-based  
504 study. *International journal of endocrinology* 2018.
- 505 Chen, L., Jiang, Y., Liang, C., Luo, Y., Xu, Q., Han, C., Zhao, Q., and Sun, B.J.M. (2019).  
506 Competitive interaction with keystone taxa induced negative priming under biochar amendments.  
507 7, 1-18.
- 508 Cheng, J., Ringel-Kulka, T., Heikamp-de Jong, I., Ringel, Y., Carroll, I., de Vos, W.M., Salojarvi, J.,  
509 and Satokari, R. (2016). Discordant temporal development of bacterial phyla and the emergence of  
510 core in the fecal microbiota of young children. *ISME J* 10, 1002-1014.
- 511 Cussotto, S., Sandhu, K.V., Dinan, T.G., and Cryan, J.F. (2018). The neuroendocrinology of the  
512 microbiota-gut-brain axis: a behavioural perspective. *Frontiers in neuroendocrinology* 51, 80-101.
- 513 D, M.S., E, R., M, B., G, L.E., L, H.B., K, S., and D, S.S. (2019). Structural equation modeling of  
514 a winnowed soil microbiome identifies how invasive plants re-structure microbial networks. *The*  
515 *ISME journal* 13, 1988-1996.
- 516 Dong, G., Zhang, J., Yang, Z., Feng, X., Li, J., Li, D., Huang, M., Li, Y., Qiu, M., and Lu, X. (2019).  
517 The association of gut microbiota with idiopathic central precocious puberty in girls. *Frontiers in*  
518 *Endocrinology* 10.
- 519 Douglas, G.M., Maffei, V.J., Zaneveld, J.R., Yurgel, S.N., Brown, J.R., Taylor, C.M., Huttenhower,  
520 C., and Langille, M.G.J.N.B. (2020). PICRUSt2 for prediction of metagenome functions. 1-5.
- 521 Du, G., Hu, J., Huang, Z., Yu, M., Lu, C., Wang, X., and Wu, D. (2019). Neonatal and juvenile  
522 exposure to perfluorooctanoate (PFOA) and perfluorooctane sulfonate (PFOS): Advance puberty  
523 onset and kisspeptin system disturbance in female rats. *Ecotoxicology and environmental safety* 167,

524 412-421.

525 F, P., G, V., A, G., V, M., B, T., O, G., M, B., P, P., R, W., V, D., et al. (2011). Scikit-learn: Machine  
526 learning in Python. *the Journal of machine Learning research* 12, 2825-2830.

527 Fan, Y., and Pedersen, O. (2020). Gut microbiota in human metabolic health and disease. *Nature*  
528 *Reviews Microbiology*, 1-17.

529 Frankenfeld, C.L., Atkinson, C., Wähälä, K., and Lampe, J.W. (2014). Obesity prevalence in relation  
530 to gut microbial environments capable of producing equol or O-desmethylangolensin from the  
531 isoflavone daidzein. *68*, 526-530.

532 Ghosh, N.K., and Cox, R.P. Induction of human follicle-stimulating hormone in HeLa cells by  
533 sodium butyrate. *Nature* 267, 435-437.

534 Katoh, K., Misawa, K., Kuma, K.i., and Miyata, T. (2002). MAFFT: a novel method for rapid  
535 multiple sequence alignment based on fast Fourier transform. *Nucleic acids research* 30, 3059-3066.

536 Kim, H.K., Kee, S.J., Seo, J.Y., Yang, E.M., Chae, H.J., and Kim, C.J. (2011a). Gonadotropin-  
537 releasing hormone stimulation test for precocious puberty. *The Korean journal of laboratory*  
538 *medicine* 31, 244-249.

539 Kim, J., Kim, S., Huh, K., Kim, Y., Joung, H., and Park, M. (2011b). High serum isoflavone  
540 concentrations are associated with the risk of precocious puberty in Korean girls. *Clinical*  
541 *endocrinology* 75, 831-835.

542 Kim, S.H., Huh, K., Won, S., Lee, K.-W., and Park, M.-J. (2015). A significant increase in the  
543 incidence of central precocious puberty among Korean girls from 2004 to 2010. *PLoS One* 10.

544 Kong, L.C., Holmes, B.A., Cotillard, A., Habi-Rachedi, F., Brazeilles, R., Gougis, S., Gausserès, N.,  
545 Cani, P.D., Fellahi, S., and Bastard, J.-P. (2014). Dietary patterns differently associate with  
546 inflammation and gut microbiota in overweight and obese subjects. *PloS one* 9.

547 Latronico, A.C., Brito, V.N., and Carel, J.-C. (2016). Causes, diagnosis, and treatment of central  
548 precocious puberty. *The Lancet Diabetes & Endocrinology* 4, 265-274.

549 Liang, Y., Ming, Q., Liang, J., Zhang, Y., Zhang, H., and Shen, T. (2020). Gut microbiota dysbiosis  
550 in Polycystic ovary syndrome (PCOS): association with obesity - A preliminary report. *Canadian*  
551 *Journal of Physiology and Pharmacology*.

552 M, B., S, H., and M, J. (2009). Gephi: an open source software for exploring and manipulating  
553 networks. *Third international AAAI conference on weblogs and social media*.

554 Mamet, S.D., Redlick, E., Brabant, M., Lamb, E.G., Helgason, B.L., Stanley, K., and Siciliano,  
555 S.D.J.T.I.j. (2019). Structural equation modeling of a winnowed soil microbiome identifies how  
556 invasive plants re-structure microbial networks. *13*, 1988-1996.

557 Mcintosh, F.M., Maison, N., Holtrop, G., Young, P., Stevens, V.J., Ince, J., Johnstone, A.M., Loble, J.,  
558 G.E., Flint, H.J., and Louis, P. Phylogenetic distribution of genes encoding  $\beta$ -glucuronidase activity  
559 in human colonic bacteria and the impact of diet on faecal glycosidase activities. *Environmental*  
560 *Microbiology* 14, 0-0.

561 Merzenich, H., Boeing, H., and Wahrendorf, J. (1993). Dietary fat and sports activity as  
562 determinants for age at menarche. *American journal of epidemiology* 138, 217-224.

563 Mugo, M.N., Bachrach, B.E., and Jacobson, J.D. (2007). Partial and Gonadotropin-Dependent  
564 Precocious Puberty.

565 Muir, A. (2006). Precocious puberty. *Pediatrics in Review* 27, 373.

566 Price, M.N., Dehal, P.S., and Arkin, A.P. (2010). FastTree 2—approximately maximum-likelihood  
567 trees for large alignments. *PloS one* 5.

568 Qi, Y., Li, P., Zhang, Y., Cui, L., Guo, Z., Xie, G., Su, M., Li, X., Zheng, X., and Qiu, Y. (2012).  
569 Urinary metabolite markers of precocious puberty. *Molecular & Cellular Proteomics* 11.  
570 Rogers, I.S., Northstone, K., Dunger, D.B., Cooper, A.R., Ness, A.R., and Emmett, P.M. (2010).  
571 Diet throughout childhood and age at menarche in a contemporary cohort of British girls. *Public*  
572 *health nutrition* 13, 2052-2063.  
573 Root, A.W. (2000). Precocious puberty. *Pediatrics in review* 21, 10-19.  
574 Ruddon, R.W., Anderson, C., Meade, K.S., Aldenderfer, P.H., and Neuwald, P.D. (1979). Content  
575 of gonadotropins in cultured human malignant cells and effects of sodium butyrate treatment on  
576 gonadotropin secretion by HeLa cells. *Cancer Research* 39, 3885-3892.  
577 Sheflin, A.M., Melby, C.L., Carbonero, F., and Weir, T.L. (2017). Linking dietary patterns with gut  
578 microbial composition and function. *Gut Microbes* 8, 113-129.  
579 Shipley, B. (2013). The AIC model selection method applied to path analytic models compared  
580 using a d-separation test. *Ecology* 94, 560-564.  
581 Soliman, A., De Sanctis, V., and Elalaily, R. (2014). Nutrition and pubertal development. *Indian*  
582 *journal of endocrinology and metabolism* 18, S39.  
583 SP, D. High-resolution sample inference from Illumina amplicon data. (Nat).  
584 Sultan, C., Gaspari, L., Kalfa, N., and Paris, F. (2012). Clinical Expression of Precocious Puberty  
585 in Girls. *Endocr Dev* 22, 84-100.  
586 Tamburini, S., Shen, N., Wu, H.C., and Clemente, J.C. (2016a). The microbiome in early life:  
587 implications for health outcomes. *Nat Med* 22, 713-722.  
588 Tamburini, S., Shen, N., Wu, H.C., and Clemente, J.C.J.N.m. (2016b). The microbiome in early life:  
589 implications for health outcomes. 22, 713-722.  
590 Valles-Colomer, M., Falony, G., Darzi, Y., Tigchelaar, E.F., Wang, J., Tito, R.Y., Schiweck, C.,  
591 Kurilshikov, A., Joossens, M., Wijnenga, C., et al. (2019). The neuroactive potential of the human  
592 gut microbiota in quality of life and depression. *Nat Microbiol* 4, 623-632.  
593 Walker, A., Pfitzner, B., Harir, M., Schaubeck, M., Calasan, J., Heinzmann, S.S., Turaev, D., Rattei,  
594 T., Endesfelder, D., and zu Castell, W. (2017). Sulfonolipids as novel metabolite markers of *Alistipes*  
595 and *Odoribacter* affected by high-fat diets. *Scientific reports* 7, 1-10.  
596 Yatsunenkov, T., Rey, F.E., Manary, M.J., Trehan, I., Dominguez-Bello, M.G., Contreras, M., Magris,  
597 M., Hidalgo, G., Baldassano, R.N., Anokhin, A.P., et al. (2012). Human gut microbiome viewed  
598 across age and geography. *Nature* 486, 222-227.  
599 Zmora, N., Suez, J., Elinav, E.J.N.r.G., and hepatology (2019). You are what you eat: diet, health  
600 and the gut microbiota. 16, 35-56.

601

602 **Funding:** This work was supported by the Shandong Provincial Key Research and Development  
603 Program 2018CXGC1219 (to ZTG), 2017G006039 (to YW), National Natural Science Foundation  
604 of China 81774152 (to RZ), 82000536 (to NJ), National Postdoctoral Program for Innovative  
605 Talents of China BX20190393 (to NJ), China Postdoctoral Science Foundation 2019M651568 (to  
606 DW), 2019M663252 (to NJ), Program for Outstanding Young Talents in Medical and Health in  
607 Shandong and Shandong Academician Workstation Program #170401 (to ZHAO Guo-Ping),  
608 Shandong Children's Microbiome Center, and Qilu Children's Hospital of Shandong University.

609 The sponsors had no role in the study design, data collection, and analysis, decision to publish, or  
610 preparation of the manuscript.

611

612 **Author contributions:** Zhongtao Gai, Ruixin Zhu, Lei Zhang, Guoping Zhao and Guoqing Zhang  
613 conceived and designed the project. Each author has contributed significantly to the work submitted.  
614 Hongying Li, Xiangrong Liang, Qian Wang, Meiling Huo, Ying Wang, Lu Zhao, Yongsheng Ge,  
615 and Changying Zhao performed the clinical diagnosis, designed and collected the clinical setting,  
616 underwent the ethical evaluation process, discussed informed consent and questionnaire data sheets  
617 with patients. Ying Wang, Lu Zhao, Yongsheng Ge, and Changying Zhao collected clinical samples  
618 and patient information, and consolidated and organized the whole data. Xin Lv completed the  
619 clinical examination work and provided the relevant data. Dingfeng Wu and Na Jiao analyzed the  
620 data. Ying Wang and Dingfeng Wu drafted the manuscript. Na Jiao, Wenxing Gao, Sheng Gao,  
621 Liwen Tao, Ruifang Cao, Yunchao Ling, Lingna Zhao, Haokui Zhou, Guoqing Zhang, Guoping  
622 Zhao, Lei Zhang, Ruixin Zhu and Zhongtao Gai revised the manuscript. All the authors read and  
623 approved the final manuscript.

624

#### 625 **Declaration of interests**

626 The authors declare no competing interests.

627

628

629 **Table 1. The number of sample and age distribution in this study.**

|                   | <b>16S (n=168)</b>    | <b>Metabolism (n=129)</b> | <b>Overlap (n=97)</b> |
|-------------------|-----------------------|---------------------------|-----------------------|
| Normal (n=67)     | 7.008 ± 0.515 (n=63)  | 6.250 ± 0.571 (n=45)      | 6.211 ± 0.629 (n=41)  |
| PP (n=133)        | 6.641 ± 0.403 (n=105) | 6.662 ± 0.458 (n=84)      | 6.890 ± 0.530 (n=56)  |
| <i>P</i> (t-test) | 0.278                 | 0.289                     | 0.108                 |

630 Age Statistics (mean ± 95 confidence interval) and difference analysis (t-test)

631

632

633

634

635

636

637

638 **Figures**

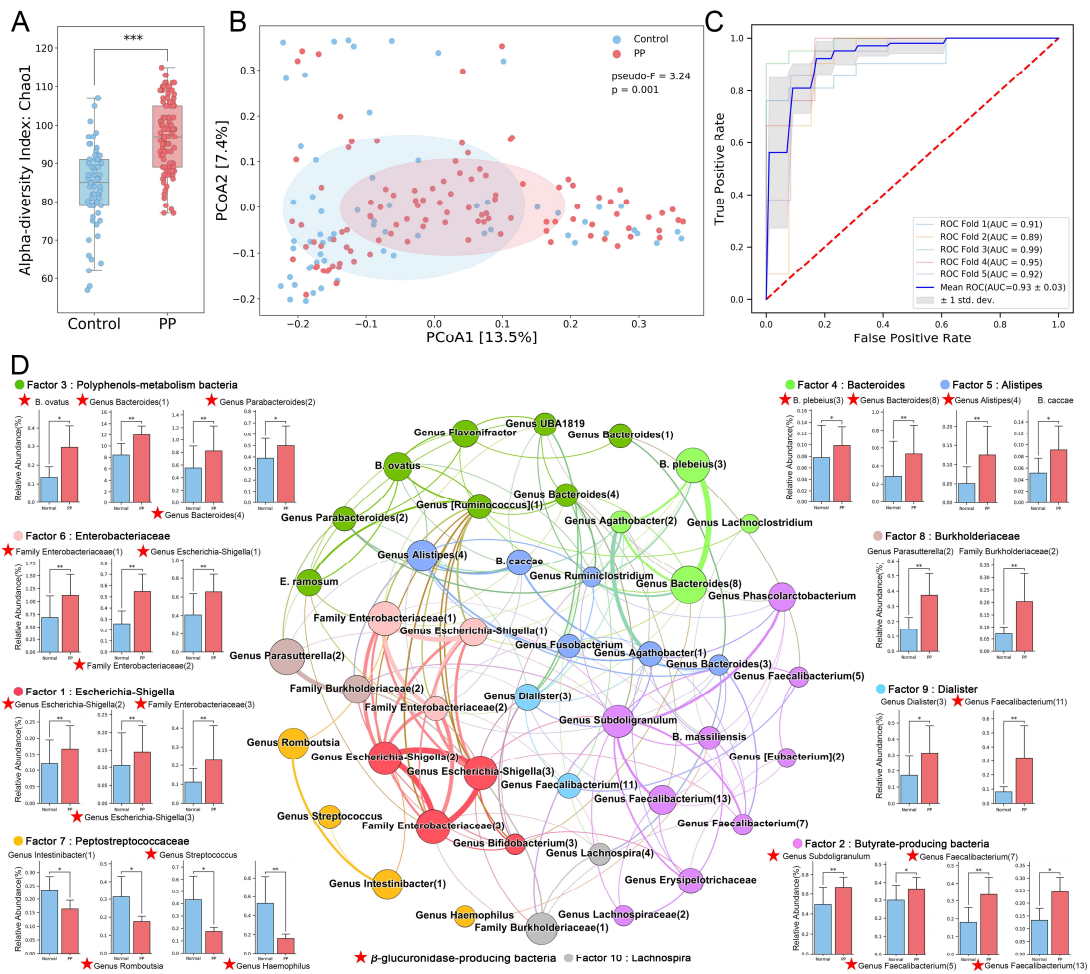

639

640 **Fig. 1. Gut microbiota dysbiosis in girls with partial PP.** A. The  $\alpha$  diversity of gut microbiota based on Chao1 for  
 641 PP and normal group (\*\*\*:  $P < 0.001$ ). B. PCoA of bacterial beta diversity based on the Bray-Curtis distance between  
 642 PP and normal groups. C. The ROC curve of the disease discriminating ability with 45 differential ASVs. D. Co-  
 643 occurrence network of differential microbiota through Spearman's rank correlation analysis with  $P < 0.05$ . Microbiota  
 644 are colored by their main latent microbial factor and the strength of correlation is represented by line thickness. The  
 645 abundance changes of the representative microbiota is displayed as bar plot (\*:  $FDR < 0.05$ , \*\*:  $FDR < 0.01$ ).  $\beta$ -  
 646 glucuronidase-producing bacteria are labeled with a red star.

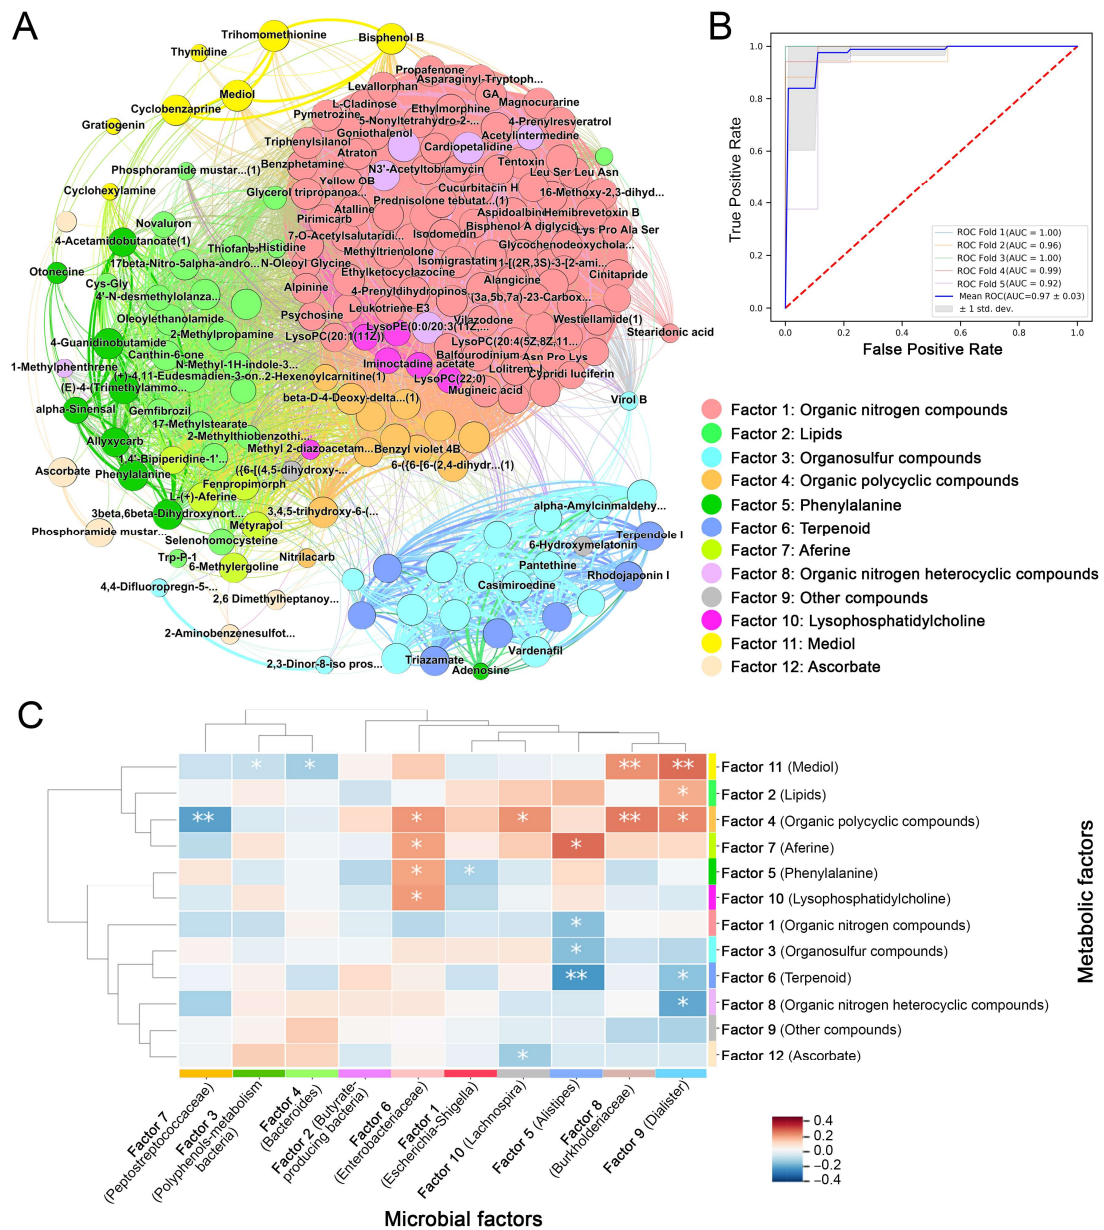

647

648 **Fig. 2. The change of serum metabolome in girls with partial PP.** A. Co-occurrence network of differential

649 metabolites through Spearman's rank correlation analysis with  $P < 0.05$ . Metabolites are colored by their main latent

650 metabolic factor and the strength of correlation is represented by line thickness. B. The ROC curve of the disease

651 discriminating ability with 182 differential metabolites. C. Heatmap plot of Pearson correlation between microbial

652 and metabolic latent factors. (\*:  $P < 0.05$ , \*\*:  $P < 0.01$ .)

653

654

655

656

657

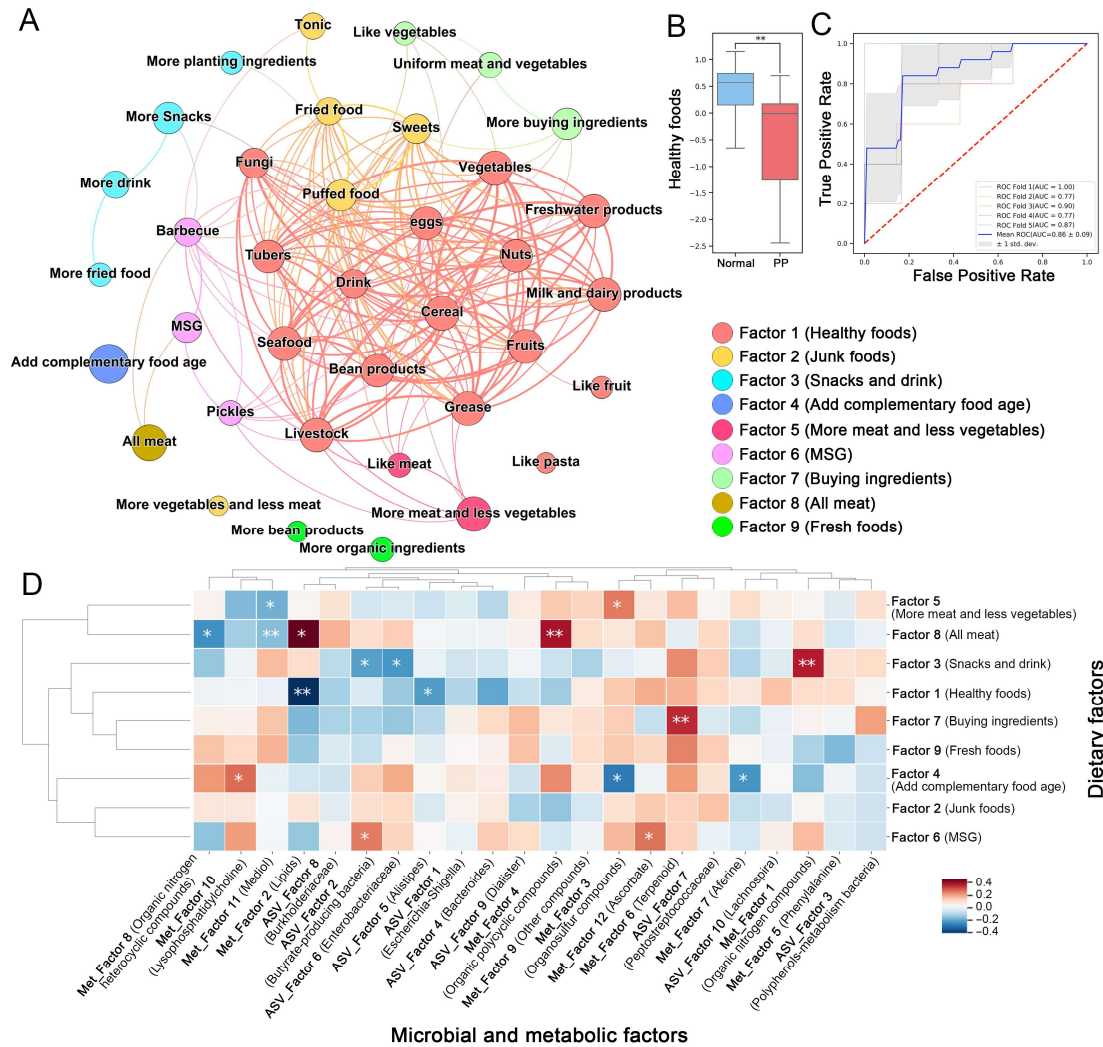

658

659 **Fig. 3. The change of dietary patterns in girls with partial PP. A.** Co-occurrence network of dietary patterns

660 through Spearman's or Kendall's rank correlation analysis with  $P < 0.05$ . Dietary patterns are colored by their main

661 latent metabolic factor and the strength of correlation is represented by line thickness. B. The difference of healthy

662 food (Factor1) intake between normal and PP groups. C. The ROC curve of the disease discriminating ability with

663 9 latent dietary factors. D. Heatmap plot of Pearson correlation between latent dietary factors and microbial or

664 metabolic latent factors. (\*:  $P < 0.05$ , \*\*:  $P < 0.01$ .)

665

666

667

668

669

670

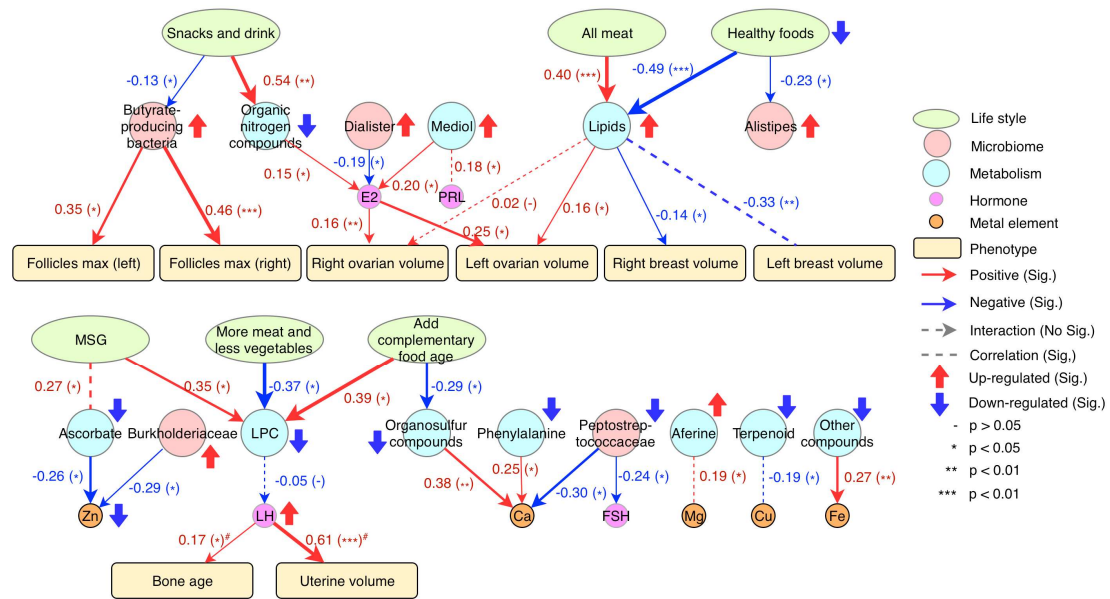

671

672 **Fig 4. Causal relationships between the latent factors of the dietary, gut microbiota, metabolism, and clinical**

673 **characteristics.** Structural equation model is implemented using piecewise SEM in R. Different types of causal

674 effect are colored by different colors (red: positive, blue: negative) and the strength of effect is represented by line

675 thickness. (-:  $P > 0.05$ , \*:  $P < 0.05$ , \*\*:  $P < 0.01$ , \*\*\*:  $P < 0.001$ , #: the regression uses glm in R with Poisson

676 distribution).

677

678

679

680

681

682

683

684

685

686

687

688

689

690

691



692 **Supplementary materials:**

693

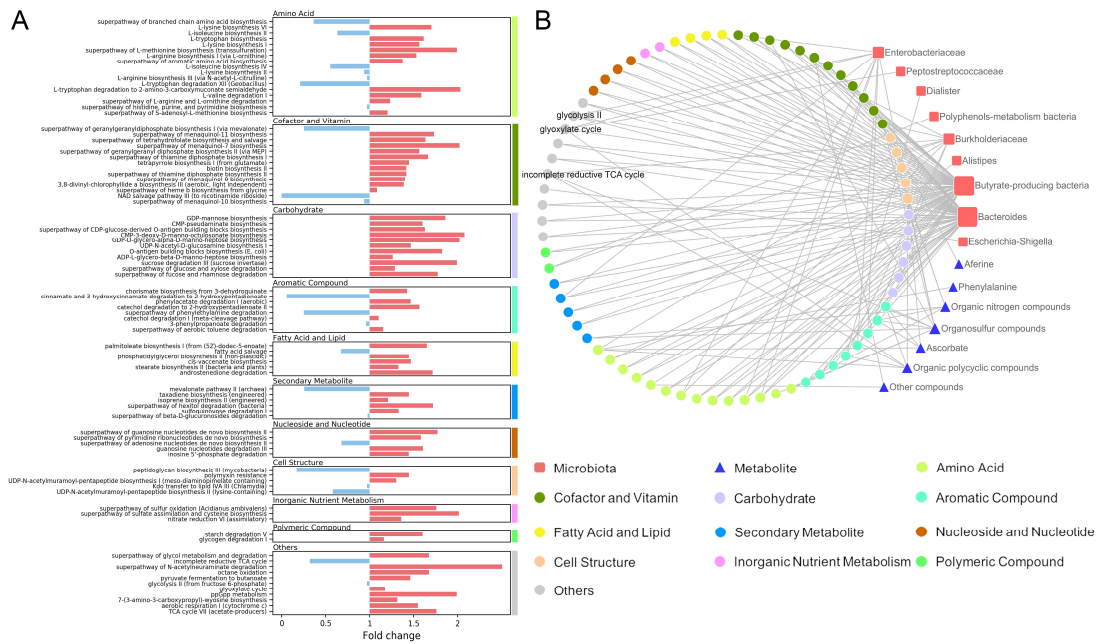

694

695 **Fig. S1. The dysbiosis of metabolic pathways in gut microbiota. A. The differential abundance changes of gut**  
 696 **microbial metabolic pathways. B. The significant correlation links between gut microbiota, serum metabolome, and**  
 697 **pathways.**

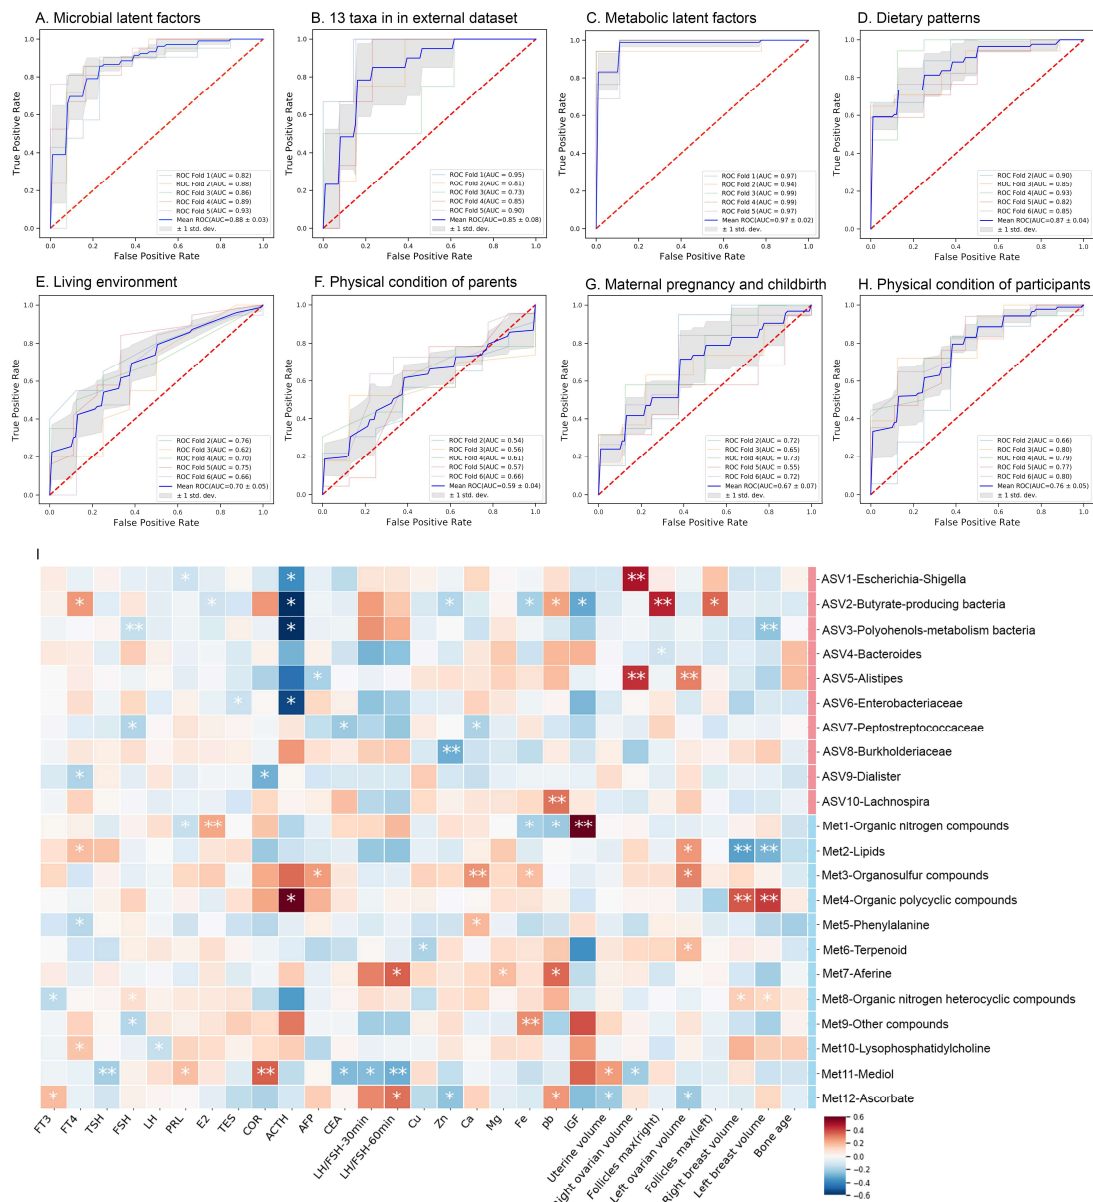

698

699 **Fig. S2. The ROC curve of the disease discriminating ability and Correlation between latent microbial factors,**

700 **latent metabolic factors, hormones, and phenotypes.** The ROC curve of the disease discriminating ability with

701 10 latent microbial factors (A), 13 taxa in external dataset (B), 12 metabolic latent factors (C), dietary patterns (D),

702 living environment (E), physical condition of parents (F), maternal health and childbirth (G) and physical condition

703 of participants (H). I. Correlation between latent microbial factors, latent metabolic factors, hormones, and

704 phenotypes. All relationships were calculated by Pearson correlation in Python with 1000 permutation test (\*: P <

705 0.05, \*\*: P < 0.01.)

706

707

708

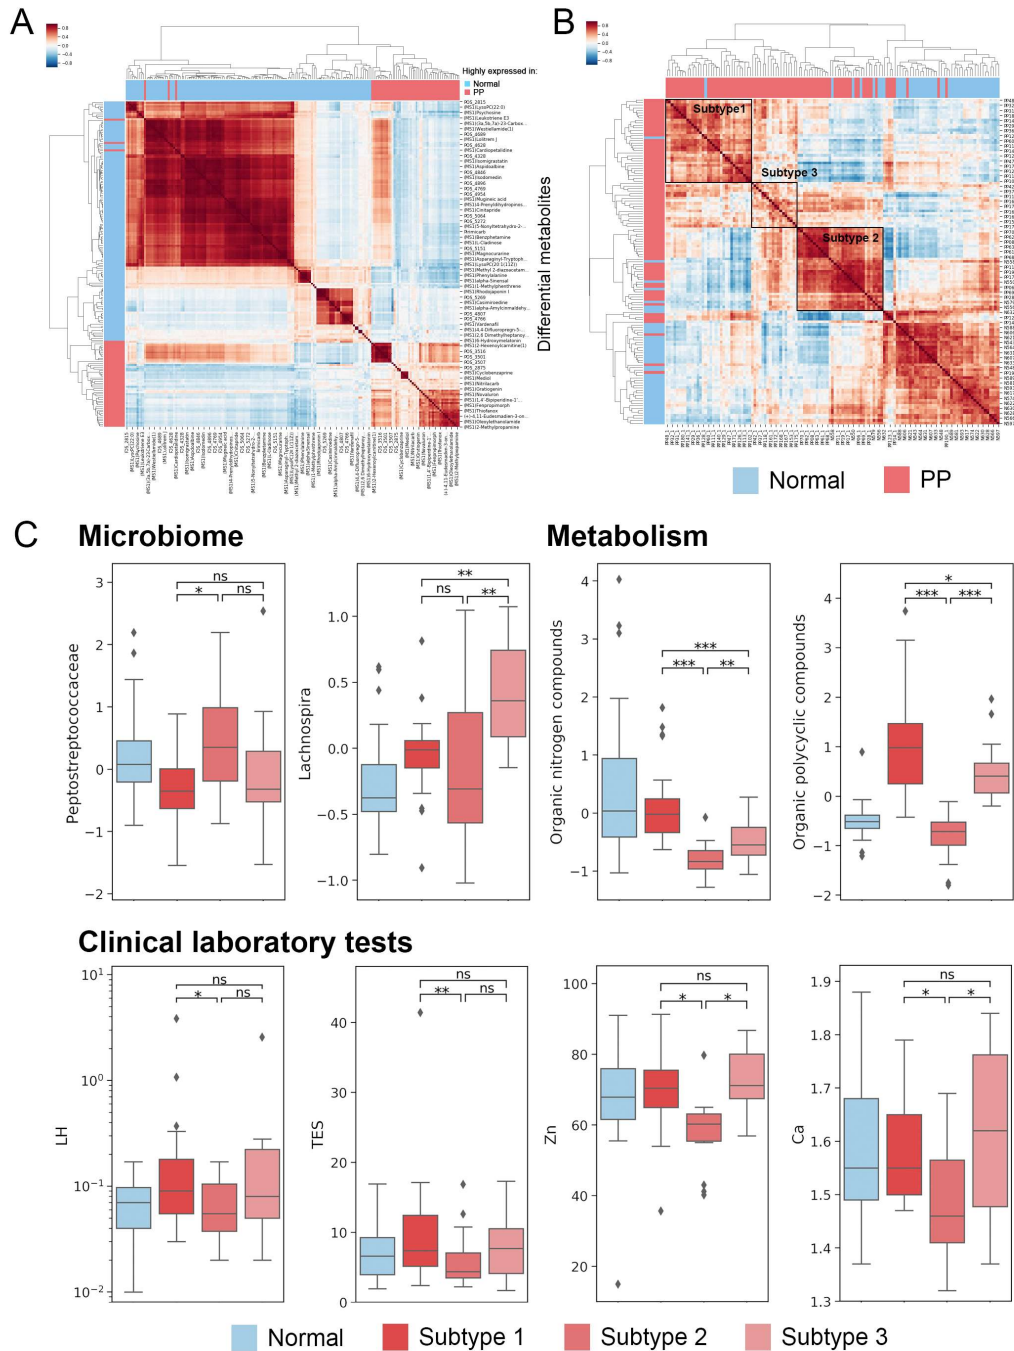

709

710 **Fig. S3. Three different subtypes in PP group.** A. Pearson correlation between differential metabolites. B. Pearson

711 correlation of samples with differential serum metabolites. Three subtypes were defined through hierarchical

712 clustering algorithm with Euclidean distance. C. The difference between subtypes in gut microbiota, serum

713 metabolome, and clinical laboratory tests. (ns:  $P > 0.05$ , \*:  $P < 0.05$ , \*\*:  $P < 0.01$ , \*\*\*:  $P < 0.001$ ).

714

715

716

717

- 718 **Table S1. Differential life styles between normal and PP group.**
- 719 **Table S2. Differential gut microbiota between normal and PP group and latent factors.**
- 720 **Table S3. 13 taxa presented same differential abundance change in external dataset.**
- 721 **Table S4. Differential serum metabolites between normal and PP group and latent factors.**
- 722 **Table S5. Gut microbiota, serum metabolome, clinical laboratory tests, and phenotype difference between PP**
- 723 **subtypes.**
- 724 **Table S6. Latent factors of life styles.**
- 725 **Table S7. Differential clinical laboratory variables between normal and PP group.**
